1 **A microbially derived tyrosine sulfated peptide mimics a plant peptide hormone**

2

3 Rory N. Pruitt<sup>1,2‡†</sup>, Anna Joe<sup>1,2†</sup>, Weiguo Zhang<sup>1¶†</sup>, Wei Feng<sup>3</sup>, Valley Stewart<sup>4</sup>, Benjamin  
4 Schwessinger<sup>1,2§</sup>, José R. Dinneny<sup>3</sup>, Pamela C. Ronald<sup>1,2\*</sup>

5

6 <sup>1</sup>Department of Plant Pathology and the Genome Center, University of California, Davis, CA  
7 95616, USA. <sup>2</sup>Feedstocks Division, Joint BioEnergy Institute and Physical Biosciences Division,  
8 Lawrence Berkeley National Laboratory, Berkeley, CA 94720, USA. <sup>3</sup>Department of Plant  
9 Biology, Carnegie Institution for Science, Stanford, CA 94305, USA. <sup>4</sup>Department of  
10 Microbiology and Molecular Genetics, University of California, Davis, CA 95616, USA.

11

12 Author for correspondence:

13 Pamela C. Ronald

14 Tel: +1 530 752 1654

15 E-mail: pcronald@ucdavis.edu

16 †These authors contributed equally to this work.

17 ‡Present Address: Centre of Plant Molecular Biology, Department of Plant Biochemistry,  
18 University of Tübingen, D-72076 Tübingen, Germany

19 ¶Present Address: Institute for Microbiology, ETH Zurich, 8093 Zürich Switzerland.

20 §Present Address: Division of Plant Science, Research School of Biology, The Australian  
21 National University, Canberra ACT 0200 Australia.

22

|                      |      |                                    |                                |
|----------------------|------|------------------------------------|--------------------------------|
| Total word count     | 5684 | No. of figures                     | 8 (Figs 1,2 and 8 in colour)   |
| Summary              | 191  | No. of Tables                      | 0                              |
| Introduction         | 751  | No of Supporting Information files | 12 (Figs S1-S10 ; Table S1-S2) |
| Material and Methods | 1173 |                                    |                                |
| Results              | 2275 |                                    |                                |
| Discussion           | 1422 |                                    |                                |
| Acknowledgements     | 63   |                                    |                                |

## 23 **Summary**

24 • The biotrophic pathogen *Xanthomonas oryzae* pv. *oryzae* (*Xoo*) produces a sulfated  
25 peptide named RaxX, which shares similarity to peptides in the PSY (*p*lant *p*eptide containing  
26 sulfated *t*yrosine) family. We hypothesize that RaxX functionally mimics the growth stimulating  
27 activity of PSY peptides.

28 • Root length was measured in Arabidopsis and rice treated with synthetic RaxX peptides.  
29 We also used comparative genomic analysis and Reactive Oxygen Species (ROS) burst assay to  
30 evaluate the activity of RaxX and PSY peptides.

31 • Here we found that a synthetic sulfated RaxX derivative comprising 13 residues  
32 (RaxX13-sY), highly conserved between RaxX and PSY, induces root growth in Arabidopsis  
33 and rice in a manner similar to that triggered by PSY. We identified residues that are required for  
34 activation of immunity mediated by the rice XA21 receptor but that are not essential for root  
35 growth induced by PSY. Finally, we showed that a *Xanthomonas* strain lacking *raxX* is impaired  
36 in virulence.

37 • These findings suggest that RaxX serves as a molecular mimic of PSY peptides to  
38 facilitate *Xoo* infection and that XA21 has evolved the ability to recognize and respond  
39 specifically to the microbial form of the peptide.

40  
41 Key words: molecular mimicry, PSY1, RaxX, tyrosine sulfated peptide, root growth, XA21,  
42 *Xanthomonas oryzae* pv. *oryzae*

43

## 44 **Introduction**

45 Some plant and animal pathogens employ molecular mimicry to gain evolutionary  
46 advantages (Mitchum *et al.*, 2012). Such microbial molecules include those that mimic ligands of  
47 host receptors, substrates of host enzymes, or host proteins themselves (Knodler *et al.*, 2001;  
48 Nesic *et al.*, 2010). Some plant pathogens produce small molecules that mimic plant hormones  
49 required for growth, development and regulation of innate immunity.

50 A well-studied case of hormone mimicry in plants is the production of coronatine by the  
51 gram-negative biotrophic bacterium *Pseudomonas syringae* (Weiler *et al.*, 1994). Coronatine  
52 structurally and functionally mimics jasmonoyl-L-isoleucine (JA-Ile), a bioactive form of the  
53 plant hormone jasmonic acid (JA) (Weiler *et al.*, 1994). JA positively regulates defense against

54 chewing insects and necrotrophic pathogens and negatively regulates defense against biotrophic  
55 and hemibiotrophic pathogens. Coronatine produced during *P. syringae* infection mimics JA  
56 action, suppressing the host defense response.

57 Plant parasitic nematodes and fungi also produce mimics of endogenous plant hormones.  
58 For example, nematodes produce peptides similar to plant CLAVATA3/ESR (CLE) peptides  
59 (Chen *et al.*, 2015), which regulate shoot meristem differentiation, root growth, and vascular  
60 development. Nematode CLEs are secreted into plant tissues where they induce specific host  
61 cells to differentiate into feeding cells that benefit the parasite (Wang *et al.*, 2005; Mitchum *et al.*,  
62 2008; Yamaguchi *et al.*, 2016). Another example is C-TERMINALLY ENCODED PEPTIDES  
63 (CEPs), a large and diverse family of effector peptides produced by sedentary plant-parasitic  
64 nematodes (PPNs). Plant CEPs inhibit root growth and increase the gene expression of a nitrogen  
65 transporter in response to nitrogen starvation. It is hypothesized that the parasite produced CEPs  
66 promote nitrogen uptake and reduce the size of the feeding site where the PPNs maintain  
67 biotrophic interactions (Eves-Van Den Akker *et al.*, 2016). Finally, the root-infecting fungus  
68 *Fusarium oxysporum* secretes a functional mimic of plant regulatory peptide RALF (rapid  
69 alkalization factor). RALF from *Fusarium oxysporum* induces extracellular alkalization in  
70 the host apoplast which favors pathogen multiplication (Murphy & De Smet, 2014; Masachis *et*  
71 *al.*, 2016).

72 We have recently shown that the rice receptor XA21 is activated by a sulfated protein,  
73 called RaxX, produced by the bacterial pathogen *Xanthomonas oryzae* pv. *oryzae* (*Xoo*). RaxX  
74 triggers a robust and effective immune response in rice expressing XA21 (Song *et al.*, 1995;  
75 Pruitt *et al.*, 2015). A synthetic 21-amino acid sulfated derivative of RaxX (RaxX21-sY) from  
76 *Xoo* strain PXO99 (Fig. 1A) is sufficient to activate XA21-mediated immune responses (Pruitt *et*  
77 *al.*, 2015).

78 Sequence analysis revealed that RaxX21 is similar to the peptide hormone PSY (plant  
79 peptide containing sulfated tyrosine), which promotes cellular proliferation and expansion in  
80 Arabidopsis (Amano *et al.*, 2007) (Pruitt *et al.*, 2015). Arabidopsis PSY1 (AtPSY1) is the best-  
81 characterized member of the plant PSY peptide family. AtPSY1 is an 18-amino acid  
82 glycopeptide with a single sulfotyrosine residue (Fig. 1A) (Amano *et al.*, 2007) that is secreted,  
83 processed from a 75 amino acid precursor and promotes root elongation primarily through  
84 regulation of cell size. AtPSY1 is widely expressed in Arabidopsis tissues (Amano *et al.*, 2007).

85 AtPSY1 promotes acidification of the apoplastic space through activation of membrane proton  
86 pumps (Fuglsang *et al.*, 2014). This acidification is thought to activate pH-dependent expansins  
87 and cell wall remodeling enzymes that loosen the cellulose network (Cosgrove, 2000; Hager, 2003).  
88 Concomitant water uptake by the cell leads to cellular expansion. In addition to PSY, plants  
89 produce three other classes of tyrosine sulfated peptides: *phytosulfokine* (PSK) (Matsubayashi &  
90 Sakagami, 1996), *root meristem growth factor* (RGF) (Matsuzaki *et al.*, 2010) and Casparian  
91 strip integrity factor (CIF) (Doblas *et al.*, 2017; Nakayama *et al.*, 2017). PSK, RGF and CIF are  
92 also processed, secreted, and play roles in regulation of growth, development and Casparian strip  
93 diffusion barrier formation in the root.

94 Here we demonstrate that RaxX peptides derived from diverse *Xanthomonas* species  
95 promote root growth, mimicking the growth promoting activities of PSY peptides. We also show  
96 that a *Xanthomonas* strain lacking *raxX* is impaired in its ability to infect rice lacking XA21,  
97 suggesting that RaxX is a virulence factor. Unlike RaxX, PSY peptides do not activate XA21-  
98 mediated immunity. Thus, XA21 is a highly selective immune receptor capable of specifically  
99 recognizing the bacterial mimic. Based on these findings we propose a model whereby *Xoo* and  
100 other *Xanthomonas* strains produce RaxX to reprogram the host environment by hijacking PSY  
101 signaling. XA21 later evolved to recognize and respond to specifically to RaxX.

102

## 103 **Materials and Methods**

104

### 105 *Identification of Putative RaxX proteins*

106 Putative PSY orthologs were identified by NCBI Protein BLAST analysis using the  
107 default settings for short sequences (Altschul *et al.*, 1990). For *Solanum lycopersicum* BLAST  
108 was performed using the Sol Genomics Network with the BLOSUM 62 matrix  
109 (<https://solgenomics.net/tools/blast/>). Proteins were identified from a single source for each  
110 plant: *Arabidopsis thaliana* Col-0 (refseq\_protein, taxid: 3702), *Oryza sativa* Nipponbare  
111 (refseq\_protein, taxid: 39947), *Triticum aestivum* Chinese Spring (taxid:4565), *Musa acuminata*  
112 subsp. *Malaccensis* (refseq\_protein, taxid 214687), *S. lycopersicum* cv. Heinz 1706 (ITAG  
113 release 2.40). BLAST was initially performed with the 18 amino acid sequence of AtPSY1  
114 (DYGDPSANPKHDPGVPPS). Criteria for selection were as follows: (1) Candidates must  
115 match the query with an expect-value  $\leq 20$  for NCBI Protein BLAST analysis (PAM 30 matrix),

116 (2) Candidates must have an invariant Asp-Tyr at the beginning of the query, (3) The full length  
117 protein must be between 60 and 200 amino acids with the PSY-like motif in the second half, (4)  
118 The protein must be predicted to have a secretion signal by SignalP 4.0 (Petersen *et al.*, 2011).  
119 Additional candidates were identified by subsequent iterative BLAST with the 18 amino acid  
120 RaxX sequences from candidate RaxX proteins identified in the initial BLAST. The final list is  
121 shown in Figure S1. If multiple splicing variants were identified in the search, only one was  
122 listed.

123

#### 124 *Sequence analysis and visualization*

125 The sequence alignments in S9 were generated with Geneious software using default  
126 parameters (Kearse *et al.*, 2012). Sequence logos (Fig. 1b) were constructed using WebLogo  
127 (Schneider & Stephens, 1990; Crooks *et al.*, 2004) with the 13-amino acid RaxX sequences  
128 shown in Table S1 and the PSY ortholog sequences in Fig. S1. The bit score for a given residue  
129 indicates the conservation at that position, while the size of the individual letters within the stack  
130 indicate relative frequency of that amino acid at the position.

131

#### 132 *Arabidopsis growth conditions*

133 All *Arabidopsis thaliana* used in this study were in the Col-0 background. The *AtTPST*  
134 mutant, *tpst-1*, (SALK\_009847) and homozygous *At1g72300* mutant (SALK\_072802C) were  
135 obtained from the Arabidopsis Biological Resource Center (ARBC). A homozygous *tpst-1* line was  
136 isolated from progeny of the SALK\_009847 seeds. The *AtPSKR1/AtPSKR2/At1g72300* triple  
137 receptor mutant (Mosher *et al.*, 2013) was obtained from Birgit Kemmerling's laboratory. Plants  
138 were grown on the indicated media or on Sungro professional growing mix under continuous light.

139

#### 140 *RaxX and PSY1 peptides*

141 The peptides used in this study are listed in Table S2. All peptides other than RaxX21-Y  
142 are tyrosine sulfated as indicated (Y<sup>S</sup>). The synthetic AtPSY1 peptide used in these experiments  
143 lacks the hydroxy- and L-Ara<sub>3</sub>- modifications at the C-terminus. The natural processed, modified  
144 state of OsPSY1a is not known. The 18-amino OsPSY1a acid peptide was synthesized based on  
145 alignment with AtPSY1. RaxX13-sY was obtained from Peptide 2.0. All other peptides were

146 obtained from Pacific Immunology. One batch of peptides was tested for each sequence. The  
147 peptides were resuspended in ddH<sub>2</sub>O.

148

#### 149 *Arabidopsis root growth assays*

150 Arabidopsis seeds were treated with 30% bleach for 12 minutes and then washed 4-5  
151 times with autoclaved water. Sterilized seeds were incubated in the dark at 4 °C for 3-4 days.  
152 Plates were prepared with 0.5× Murashige and Skoog (MS) medium with vitamins (Caisson,  
153 MSP09), 1% sucrose, pH 5.7, 0.5% Phytigel (Sigma, P8169). Peptide (or water for mock  
154 treatments) was added to the indicated concentration (from a 1 mM stock) just before pouring  
155 into a plate. Seeds were placed on the plate (20 seeds per plate), and the lids were secured with  
156 Micropore surgical tape (1530-0). Plates were incubated vertically under continuous light (55  
157  $\mu\text{mol m}^{-2} \text{s}^{-1}$ ) at 24 °C. Seedlings with delayed germination were marked after 3 days, and were  
158 not included in the analysis. Root lengths were measured after 8 days.

159

#### 160 *Arabidopsis live imaging of root growth*

161 Live imaging of roots was performed as described previously with modifications to the  
162 media (Duan *et al.*, 2013; Geng *et al.*, 2013). Sterilized *tpst-1* seeds were grown on 1% agar  
163 media containing 1× MS nutrients (Caisson, MSP01), 1% sucrose, and 0.5 g l<sup>-1</sup> MES, adjusted to  
164 pH 5.7 with KOH. After 6 days, seeds were transferred to 0.5% Phytigel (Sigma, P8169) media  
165 containing 0.5× MS (Caisson, MSP09, 1% sucrose, and 0.5 g l<sup>-1</sup> MES, adjusted to pH 5.7 with  
166 KOH) with or without the indicated peptides. Imaging and semiautomated image analysis were  
167 performed as described previously (Geng *et al.*, 2013).

168

#### 169 *Rice root growth assays*

170 Seeds of *Oryza sativa* sp. *japonica* cultivars Kitaake (lacking the *Xa21* gene), a  
171 transgenic line of Kitaake carrying *Xa21* (XA21-Kitaake), Taipei 309 (TP309), (lacking the  
172 *Xa21* gene), or a transgenic line of TP309 carrying *Xa21* driven by its native promoter (XA21-  
173 TP309) were dehusked and sterilized with 30% bleach for 30 min. The seeds were washed 4-5  
174 times with water and plated to cups with 50 mL 0.5× MS (Caisson MSP09), 1% sucrose (pH 5.7  
175 with KOH/ NaOH) containing 0.25% Phytigel. Peptides were added to 100 nM just before  
176 pouring into the cups. 20 seedlings were added per cup, and the cups were sealed with clear lids.

177 The seedling roots were measured after 4-6 day incubation in a 28 °C chamber with 13 h/11 h  
178 light/dark cycle and a light intensity of 15  $\mu\text{mol m}^{-2} \text{s}^{-1}$ .

179

#### 180 *ROS Assays*

181 Kitaake and XA21-Kitaake rice plants were grown as previously described (Pruitt *et al.*,  
182 2015). Briefly, seeds were germinated on water-soaked paper and transplanted in sandy soil in 5.5  
183 inch square pots. Plants were grown in tubs filled with fertilizer water in greenhouse. Six weeks  
184 after planting the rice was transferred to a growth chamber set to 28 °C/24 °C, 80%/85%  
185 humidity, and 14/10 h lighting for the day/night cycle. ROS assays were carried out using leaves  
186 of 6-week-old rice plants as described previously (Pruitt *et al.*, 2015). Briefly, leaves were cut  
187 longitudinally along the mid vein and then transversely into 1- to 1.5-mm-thick leaf pieces. After  
188 overnight incubation floating on sterile water, leaf pieces were transferred into a 96-well white  
189 plate (2 pieces per well). Each well contained 100  $\mu\text{l}$  of excitation solution [0.2 mM L-012  
190 (Wako) and 50  $\mu\text{g ml}^{-1}$  horseradish peroxidase (Sigma)]. The indicated concentration of peptides  
191 was added (or water for mock control), and chemiluminescence was measured for 90 minutes  
192 with a TriStar (Berthold) plate reader.

193

#### 194 *Xanthomonas inoculation on rice*

195 TP309 and XA21-TP309 were greenhouse grown as described above for Kitaake. Plants  
196 were inoculated 3 days after transfer using the scissors clipping method (Kauffman *et al.*, 1973).  
197 PXO99 strains were grown on peptone sucrose agar (PSA) plates at 28 °C with the appropriate  
198 antibiotic(s). The bacteria were resuspended in water at a density of  $10^6$  colony forming units per  
199 mL. Water soaked lesions were measured 14 days after inoculation. Bacterial growth analysis *in*  
200 *planta* was performed as previously described (Bahar *et al.*, 2014). PXO99 strains used in this  
201 study were previously reported (Pruitt *et al.*, 2015). PXO99 $\Delta$ *raxX* is a marker free mutant and  
202 PXO99 $\Delta$ *raxST* is a marker exchange mutant with a spectinomycin resistance gene. The *raxX* and  
203 *raxST* sequences including their predicted promoter were cloned into pVSP61 vector (Loper &  
204 Lindow, 1994) and transformed into PXO99 strains.

205

## 206 **Results**

207 *RaxX is similar in sequence to PSY peptides*

208 The region of similarity between RaxX from *Xoo* and AtPSY1 corresponds to amino  
209 acids 40-52 of RaxX. RaxX and AtPSY1 share 10 identical residues over this region (Fig. 1a).  
210 RaxX is sulfated by the bacterial sulfotransferase RaxST on Y41, which corresponds to the  
211 sulfated residue of AtPSY1 (Amano *et al.*, 2007; Pruitt *et al.*, 2015). An aspartate precedes the  
212 sulfated tyrosine in both RaxX and AtPSY1. The presence of a nearby acidic residue is a  
213 common hallmark of tyrosine sulfation sites (Moore, 2009).

214 We extended our analysis to include PSY orthologs and RaxX peptides from diverse  
215 species (Fig. S1-2, Table S1). BLAST search using the 18 amino acid AtPSY1 as a query  
216 identified 8 PSY-like proteins in rice (Fig. S1). One of the rice PSY proteins, OsPSY1  
217 (Os05g40850), has four nearly identical PSY-like repeats, the first of which (OsPSY1a) is shown  
218 in Fig 1. Analysis of Arabidopsis using the same criteria also revealed a total of eight PSY-like  
219 proteins including the three that had been previously identified (Fig. S1) (Amano *et al.*, 2007;  
220 Matsubayashi, 2014). We also identified PSY-like proteins in tomato, banana and wheat, three  
221 diverse and economically important crops (Fig. S1). Alignment of PSY peptides from these  
222 different species revealed a highly conserved 13-amino acid region beginning with the aspartate-  
223 tyrosine residue pair (Fig. S1). This 13-amino acid sequence corresponds precisely to the region  
224 of sequence similarity between RaxX and AtPSY1 (Fig. 1a).

225 Alignment of the RaxX sequences from diverse strains reveals a region of high  
226 conservation immediately around the tyrosine, which is sulfated in *Xoo* strain PXO99 (Fig. S2).  
227 Sequence logos were constructed for the PSY-like motif using the identified RaxX and PSY  
228 sequences (Fig. 1b). These logos further highlight the similarity of 13-amino acid region of  
229 RaxX and PSY sequences. Residues that are highly variable in RaxX are also highly variable in  
230 PSY. Based on the similarity of RaxX and PSY peptides and the finding that RaxX is also  
231 tyrosine sulfated (Pruitt *et al.*, 2015), we hypothesized that RaxX serves as a functional mimic of  
232 PSY peptides and that RaxX may have PSY-like activity.

233

### 234 *RaxX promotes root growth similar to PSY peptides*

235 To test our hypothesis that RaxX is a functional mimic of PSY peptides, we evaluated the  
236 effect of RaxX21 treatment on root growth. We first tested the peptides on Arabidopsis seedlings,  
237 because PSY signaling has been studied exclusively in this system. RaxX21-sY promoted root  
238 growth in a similar manner to that observed for AtPSY1 in Arabidopsis (Fig. 2a, b). After 8 days



239 on media containing 100 nM RaxX21-sY, the average root length of Col-0 seedlings was 61 mm  
240 whereas seedlings grown on plates without peptide had an average root length of 54 mm. Similar  
241 root growth-promoting effects were observed in experiments using AtPSY1 and OsPSY1a  
242 peptides (Fig. 2a, b).

243 We also performed root growth experiments on an Arabidopsis line lacking AtTPST, the  
244 tyrosine sulfotransferase responsible for modification of PSY, PSK and RGF peptides (Komori  
245 *et al.*, 2009; Matsuzaki *et al.*, 2010). *tpst-1* mutant plants are dwarf and have stunted roots  
246 (Komori *et al.*, 2009). Because this mutant lacks endogenous PSY, PSK and RGF signaling,  
247 effects of exogenous application of sulfated peptides can be better quantified (Igarashi *et al.*,  
248 2012; Mosher *et al.*, 2013). Consistent with earlier reports, we observed that mock treated  
249 *tpst-1* mutant seedlings have much shorter roots than Col-0 (Fig. 2a-d). Treatment of *tpst-1*  
250 plants with RaxX21-sY or AtPSY1 increases root growth 1.5-2 fold relative to mock treatment  
251 (Fig 2c, d).

252 We determined the minimum concentration of RaxX21-sY needed to induce root growth  
253 in Arabidopsis. *tpst-1* seeds were grown on plates containing 0.1-250 nM peptide. RaxX21-sY  
254 was effective at inducing root growth at concentrations in the low nanomolar range (Fig. S3).  
255 This activity is comparable to PSK (Fig. S3). Nonsulfated RaxX21 (RaxX21-Y) also promoted  
256 root growth, but was less active than the sulfated version (Fig. 2a-d, S3). AtPSY1 was less active  
257 than RaxX21-sY and PSK. We hypothesize that the reduced potency of the synthetic AtPSY1  
258 used in this study was due to the lack of glycosylation (See materials and methods).  
259 Glycosylation of AtPSY1 was previously shown to be important for full activity (Amano *et al.*,  
260 2007).

261 We next used a live root imaging system (Duan *et al.*, 2013; Geng *et al.*, 2013) to assess  
262 changes in root growth rate upon exposure to RaxX21-sY. Root growth of *tpst-1* seedlings on  
263 plates containing 250 nM RaxX21-sY, AtPSY1 or no peptide (Mock) was monitored over 24 h.  
264 Within 4-5 hours, seedlings grown on RaxX21-sY- or AtPSY1-containing plates had an  
265 increased root growth rate compared to seedlings on mock plates (Fig. 2e).

266 Because RaxX21-sY comes from the rice pathogen *Xoo*, we tested whether this peptide  
267 also has growth promoting activity in rice seedlings. AtPSY1 and RaxX21-sY treatment  
268 significantly enhanced root growth on rice varieties Tapei 309 (Fig. 2f) and Kitaake (Fig. S4).  
269 We also tested if the root growth promotion activity is attenuated in the presence of XA21. We

270 found that treatment of RaxX21-sY still induced longer roots in XA21-TP309 plants (Fig. S5).  
271 We hypothesize that RaxX21-sY fails to activate XA21 in young seedlings, because XA21-  
272 mediated immune response is developmentally controlled in rice (Century *et al.*, 1999).  
273 Collectively, these results indicate that RaxX21-sY promotes root growth in a similar manner to  
274 PSY and PSK peptides in both Arabidopsis and rice.

275

#### 276 *RaxX induces root growth through the same signaling pathway as PSY1*

277 To determine if RaxX induces root growth using the same signaling pathway as AtPSY1,  
278 we grew Arabidopsis seedlings on plates containing both RaxX and AtPSY1 peptides. Roots of  
279 Arabidopsis seedlings grown on plates containing 100 nM RaxX21-sY and 100 nM AtPSY1  
280 were similar in length to those grown on plates with 100 nM RaxX21-sY alone (Fig. 3). Similar  
281 results were observed when seedlings were co-treated with 100 nM RaxX21-sY and 100 nM  
282 PSK (Fig. 3). The observation that RaxX, AtPSY1, and PSK do not have additive effects on root  
283 growth suggests that these peptides induce root growth via the same pathway. Alternatively, it  
284 may be that the 100 nM RaxX21-sY treatment already reached the maximum growth potential  
285 (Matsuzaki *et al.*, 2010).

286

#### 287 *At1g72300 is not required for induction of root growth by RaxX or AtPSY1*

288 The leucine-rich repeat receptor kinase encoded by *At1g72300* has been proposed to  
289 serve as the AtPSY1 receptor (Amano *et al.*, 2007). We therefore tested if *At1g72300* is required  
290 for perception of RaxX21-sY. For these assays we used the *At1g72300* mutant line  
291 SALK\_072802C. This is the same line used in all published studies of PSY1/At1g72300,  
292 (Amano *et al.*, 2007; Mosher & Kemmerling, 2013; Mosher *et al.*, 2013; Fuglsang *et al.*, 2014;  
293 Mahmood *et al.*, 2014), and was shown to have the lowest transcript level of available mutants  
294 (Fuglsang *et al.*, 2014). We independently validated the mutant genotype (Fig. S6). We found  
295 that treatment of the *At1g72300* mutant line with either RaxX21-sY or AtPSY1 increased root  
296 growth in a similar manner to that observed for treatment of wild type Col-0 seedlings (Fig. 2a, b,  
297 4). We also found that a mutant lacking *At1g72300* and the homologous PSK receptors,  
298 *AtPSKR1* and *AtPSKR2*, (*pskr1/pskr2/At1g72300*) also responds to RaxX and AtPSY1  
299 treatment (Fig. 4). *pskr1/pskr2/At1g72300* did not respond to synthesized Arabidopsis PSK

300 (AtPSK), whereas PSK promotes root growth of wild-type Col-0 and *At1g72300* (Fig. 4). These  
301 results indicate that *At1g72300* is not required for perception of RaxX21-sY or AtPSY1.

302

303 *RaxX21-sY and PSY do not attenuate elf18-induced growth inhibition*

304 Exogenous addition of PSK has previously been shown to attenuate the Arabidopsis  
305 immune response to biotrophic pathogens (Igarashi *et al.*, 2012; Mosher & Kemmerling, 2013;  
306 Mosher *et al.*, 2013). Although PSK and AtPSY1 share no sequence similarity, they have  
307 nevertheless been hypothesized to serve similar roles (Mosher & Kemmerling, 2013; Mosher *et*  
308 *al.*, 2013; Matsubayashi, 2014). Thus, we hypothesized that induction of PSY signaling by PSY  
309 or RaxX21-sY may also attenuate plant immune responses. To test this hypothesis, we employed  
310 a seedling growth inhibition assay. Arabidopsis seedlings were grown in the presence of the  
311 bacterial elicitor elf18, which causes activation of immune response and impairs growth. We  
312 demonstrated that co-incubation of seedlings with PSK attenuates elf18-mediated growth  
313 inhibition as previously reported (Igarashi *et al.*, 2012) (Fig. S7). However, RaxX21-sY and  
314 AtPSY1 do not prevent elf18-triggered growth inhibition in Arabidopsis under the conditions  
315 tested (Fig. S7). These results indicate that RaxX21-sY and PSY1 do not have the same effects  
316 on immune modulation as PSK in Arabidopsis seedlings in response to elf18 treatment.

317

318 *RaxX and PSY peptides differentially activate PSY-like growth promotion and XA21-immune*  
319 *responses*

320 Activation of XA21-mediated immunity by RaxX21-sY triggers a number of immune  
321 responses including production of reactive oxygen species (ROS), induction of marker gene  
322 expression, and production of ethylene (Pruitt *et al.*, 2015). These immune responses are tightly  
323 regulated, because aberrant activation of immunity can have negative effects on plant growth and  
324 health (Spoel & Dong, 2012; Rodriguez *et al.*, 2015). We therefore hypothesized that XA21  
325 would specifically recognize RaxX but not the homologous PSY peptides.

326 We have previously shown that RaxX21-sY treatment induces robust ROS production in  
327 rice leaves expressing XA21 (Pruitt *et al.*, 2015). Therefore, to assess XA21-mediated  
328 recognition of the sulfated peptides, we measured ROS production in XA21 rice leaves upon  
329 treatment with water, RaxX21-sY, AtPSY1, or OsPSY1a (Fig. 5a). Unlike RaxX21-sY, AtPSY1  
330 and OsPSY1a failed to induce ROS production in XA21 rice leaves. Robust ROS production was

331 not observed in rice leaves lacking XA21 (Fig. 5b). PSK also failed to activate XA21-mediated  
332 immune response (Fig. 5a, b). These results suggest that the XA21 and PSY receptor(s) have  
333 different specificities. PSY signaling with respect to primary root growth is activated by both  
334 PSY and RaxX (Fig. 2), whereas the XA21-mediated immune response is only activated by  
335 RaxX.

336 To further delineate the region of RaxX required for PSY-like activity and activation of  
337 XA21, we synthesized two smaller RaxX peptides based on similarity to AtPSY1. RaxX16-sY  
338 begins with the aspartate (D40) at the beginning of the PSY-like motif (Fig. 1a). RaxX13-sY also  
339 begins with D40 but is C-terminally truncated relative to RaxX21-sY and RaxX16-sY (Fig. 1a).  
340 RaxX13-sY contains the region of highest similarity shared between the RaxX and PSY peptides  
341 (Fig. 1, S1). Both the RaxX13-sY and RaxX16-sY peptides are still capable of promoting root  
342 growth in Arabidopsis and rice (Fig. 5c, d). We next tested whether these peptides could activate  
343 XA21-mediated immunity in the same manner as RaxX21-sY (Pruitt *et al.*, 2015). For this  
344 purpose, ROS production was measured in detached XA21 rice leaves treated with water,  
345 RaxX13-sY, RaxX16-sY, or RaxX21-sY. RaxX16-sY and RaxX21-sY triggered a ROS response  
346 characteristic of the XA21-mediated immune response. In contrast, treatment with RaxX13-sY  
347 did not induce ROS production in XA21 rice leaves (Fig. 5a). Thus, RaxX13-sY is able to induce  
348 AtPSY1-like growth effects, but fails to activate an XA21-mediated immune response. These  
349 experiments reveal that RaxX residues 53-55, which are present in RaxX16 but not RaxX13, are  
350 important for activation of XA21 but are not required for root growth promoting activity.

351

### 352 *RaxX from diverse Xanthomonas species have PSY activity*

353 We next asked whether RaxX from other *Xanthomonas* strains also have PSY-like  
354 activity. To address this question, we synthesized 24-amino acid peptides covering the PSY-like  
355 region for three different RaxX sequences from *X. oryzae* pv. *oryzicola* strain BSL256 (RaxX24-  
356 Xoc-sY), *X. campestris* pv. *musacearum* strain NCPPB4394 (RaxX24-Xcm-sY), and *X.*  
357 *euvesicatoria* strain 85-10 (RaxX24-Xe-sY) (Table S2). *Xoc*, *Xcm*, and *Xe* are pathogens of rice,  
358 banana, and tomato/pepper, respectively (Table S1). *Xoc* colonizes the mesophyll of rice,  
359 whereas *Xoo* colonizes the xylem. All three RaxX sulfated peptides promoted root growth on  
360 Arabidopsis seedlings in a manner similar to that of RaxX21-sY derived from *Xoo* strain PXO99  
361 (Fig. 6). In other words, the proteins encoded by diverse allelic variants of *raxX* retain PSY like

362 activity. These results demonstrate that the use of RaxX as a mimic of plant PSYs is employed  
363 by many *Xanthomonas* species that infect diverse plant species.

364

### 365 *RaxX facilitates Xoo infection*

366 In some cases, the ability of a pathogen to mimic a host biological process can facilitate  
367 pathogen infection (Weiler *et al.*, 1994; Melotto *et al.*, 2006; Mitchum *et al.*, 2012; Chen *et al.*,  
368 2015). We therefore tested if RaxX contributes to the virulence of *Xoo* in plants lacking XA21.  
369 We did not observe an effect of RaxX on disease lesion development in TP309 rice leaves using  
370 standard scissor clipping inoculation (a high inoculum concentration of  $10^8$  colony forming units  
371 per mL) (da Silva *et al.*, 2004; Pruitt *et al.*, 2015). Inoculating with a low inoculum concentration  
372 is known to reveal subtle virulence differences between strains (Starkey & Rahme, 2009). Thus,  
373 we challenged TP309 leaves with PXO99 strains at a density of  $10^6$  colony forming units per mL.  
374 Under this condition, the PXO99 $\Delta$ *raxX* strain, but not the complemented strain  
375 (PXO99 $\Delta$ *raxX*(*praxX*)), formed shorter lesions compared with wild-type PXO99 (Fig. 7a). We  
376 also tested if RaxST-mediated sulfation is required for the virulence activity of RaxX. A PXO99  
377 strain lacking RaxST (PXO99 $\Delta$ *raxST*) also formed shorter lesion than PXO99 on TP309 rice  
378 leaves in low inoculum concentration experiments (Fig. 7a). PXO99 $\Delta$ *raxST* (*praxST*) regained  
379 the ability to form long lesions similar to the wild-type strain (Fig. 7a). PXO99 wild-type,  
380 PXO99 $\Delta$ *raxX*(*praxX*) and PXO99 $\Delta$ *raxST*(*praxST*) form short lesions on XA21-TP309 at a lower  
381 inoculum concentration suggesting activation of the XA21 immune response (Fig. 7b). As  
382 expected, PXO99 $\Delta$ *raxX* and PXO99 $\Delta$ *raxST* evade XA21-mediated immune response and form  
383 longer lesions (Fig. 7b). The bacterial populations of PXO99 $\Delta$ *raxX* and PXO99 $\Delta$ *raxST* were  
384 less than those of strains PXO99, PXO99 $\Delta$ *raxX*(*praxX*), and PXO99 $\Delta$ *raxST* (*praxST*) 12 days  
385 after inoculation (Fig. S8). These results suggest that RaxX is a virulence factor that facilitates  
386 *Xoo* infection and that RaxST-mediated sulfation is also required for this virulence activity.

387

## 388 **Discussion**

389 In a classical evolutionary arms race, both the pathogen and host develop and deploy an  
390 arsenal of strategies to infect or resist their partner. For example, many pathogens secrete an  
391 array of molecular factors designed to manipulate host biology and suppress the immune  
392 response. In turn, plants have developed a set of immune receptors that recognize these

393 molecules or their activities and launch mechanisms to destroy the pathogen, which the pathogen  
394 then tries to counter.

395         The findings reported here and in previous studies, suggest a model where *Xoo* produces,  
396 sulfates, and secretes a peptide that mimics PSY peptides (da Silva *et al.*, 2004; Pruitt *et al.*,  
397 2015) (Fig. 8). Plants evolved the receptor XA21 to specifically recognize the bacterial mimic,  
398 allowing it to launch a defense response in the presence of the pathogen but not in the presence  
399 of the highly similar PSY peptide hormones, which are predicted to be necessary for normal  
400 growth and development.

401         The hypothesis that RaxX is a mimic of PSY is well supported by the high level of  
402 sequence similarity (Fig. 1), the tyrosine sulfation status of RaxX and PSY peptides (Amano *et*  
403 *al.*, 2007; Pruitt *et al.*, 2015), and the similar growth promoting activities of both peptides (Fig. 2,  
404 S3-5). Significantly, both RaxX and PSY1 require tyrosine sulfation for full activity. Tyrosine  
405 sulfation is an important posttranslational modification that mediates protein-protein interactions.  
406 Plants and animals employ tyrosine-sulfated proteins, to regulate growth, development,  
407 immunity and other biological processes. Tyrosine sulfated proteins in animal cells have roles in  
408 coagulation, leukocyte adhesion, HIV entry, and chemokine signaling (Farzan *et al.*, 1999;  
409 Moore, 2009; Stone *et al.*, 2009).

410         Due to the similar sequence and functional mimicry in root growth promotion we  
411 hypothesize that PSY1 and RaxX target a common cognate plant receptor. The leucine-rich  
412 repeat receptor kinase At1g72300 was originally hypothesized to serve as the receptor for  
413 AtPSY1 based on the observation that the root length was not increased by exogenous AtPSY1  
414 treatment in an At1g72300 mutant (Amano *et al.*, 2007). However, the At1g72300 mutant line  
415 still partially responds to AtPSY1 treatment in proton efflux experiments (Fuglsang *et al.*, 2014),  
416 and transcriptomics analysis reveals that many AtPSY1-regulated genes are regulated  
417 independently of At1g72300 (Mahmood *et al.*, 2014). We found that RaxX and AtPSY1 still  
418 promote root growth in the absence of At1g72300. Collectively, these findings indicate that  
419 At1g72300 is not the receptor for PSY peptides or that it is not the only receptor. Additional  
420 work is required to understand how PSY and RaxX are perceived in plants.

421         The precise role of RaxX in *Xoo* biology is not known. Because bacteria have been  
422 demonstrated to employ bio-mimics to hijack the plants' endogenous systems and reprogram the  
423 host environment to facilitate pathogen infection (Weiler *et al.*, 1994; Melotto *et al.*, 2006;

424 Mitchum *et al.*, 2012; Chen *et al.*, 2015), we hypothesize that *Xoo* may use RaxX in a similar  
425 manner. Here we show that RaxX is required for the full virulence of *Xoo* to infect rice leaves  
426 (Fig. 7). *Xoo* is a biotrophic pathogen and thus requires living host tissues, which ensures  
427 prolonged supply of carbon and other nutrients necessary for bacterial survival. The ability of  
428 *Xoo* to promote the host growth would thus benefit a biotroph (Nino-Liu *et al.*, 2006; Fatima &  
429 Senthil-Kumar, 2015).

430 Xanthomonads enter through hydathodes, natural openings in the leaf, or wounds and  
431 multiply in the xylem or mesophyll tissues. To date, growth promoting activities for RaxX or  
432 PSY1 have only been demonstrated on roots. We used induction of root growth as an indicator of  
433 PSY-like activity in this study because this is a robust well-characterized effect of AtPSY1. It is  
434 known, however, that *AtPSY1* is widely expressed in various plant tissues (Amano *et al.*, 2007).  
435 *Arabidopsis* seedlings overexpressing *AtPSY1* not only have longer roots, but also larger  
436 cotyledons (Amano *et al.*, 2007). Recently, a PSY-like peptide in soybean is shown to be  
437 translocated from the roots to the xylem (Okamoto *et al.*, 2015). These findings suggest that PSY  
438 peptides likely have important unidentified roles outside of the roots.

439 The growth promoting properties of RaxX are reminiscent of the hypertrophy in tomato  
440 and pepper leaves induced by the *Xe* effector AvrBs3. AvrBS3 enhances transcription of host  
441 genes including auxin-induced and expansin-like genes that contribute to host cell enlargement  
442 (Marois *et al.*, 2002). This phenotype is thought to facilitate dissemination because the bacteria  
443 are able to multiply in the enlarged cells and escape from the infected site to other plants (Marois  
444 *et al.*, 2002; Kay *et al.*, 2007). The AvrBs3 example suggests a possible role for RaxX in  
445 bacterial maintenance, persistence or transmission.

446 In this paper we demonstrate that XA21 can be activated by RaxX16 but not by RaxX13,  
447 indicating that the C-terminal end of the RaxX16 sequence (RaxX amino acids 53-55) is required  
448 for XA21 recognition. This result may explain why PSY1 cannot activate XA21: PSY1 has C-  
449 terminal residues which differ from RaxX16. Residues within the RaxX13 region are also  
450 important for recognition by XA21. In a previous study, we identified three residues (44, 46, and  
451 48) of RaxX from *Xoo* that are involved in XA21 activation (Pruitt *et al.*, 2015). Mutation of  
452 RaxX P44 and P48 completely abolishes the immunogenic activity of RaxX on XA21-rice.  
453 Mutation of A46 has a partial effect. Interestingly, these residues are not required for root growth

454 promoting activity. For example, RaxX24-Xoc contains amino acid differences at positions 44,  
455 46 and 48, but is still capable of inducing root growth in Arabidopsis (Fig. 6, S2, Table S1).

456 Comparison of the RaxX-Xoo and RaxX-Xoc sequences with rice PSY sequences  
457 suggests the possibility that RaxX from the *Xanthomonas* strains have evolved to mimic different  
458 PSY peptides. The three residues from RaxX-Xoo (strain PXO99) which are required for  
459 recognition by XA21 are identical to those in OsPSY1a (Fig. S9). In contrast, the amino acids of  
460 RaxX-Xoc (strain BSL256) are similar to those in OsPSY2. If these two peptides have evolved to  
461 mimic different PSY peptides, it would indicate that there are multiple PSY receptors in rice,  
462 which differentially recognize diverse PSY peptides. Multiple receptors have been reported for  
463 RGF peptides. It is not yet clear if the RGF receptors have different affinities for specific RGF  
464 peptides (Shinohara *et al.*, 2016). Using multiple receptors and multiple ligands with different  
465 affinities would allow for a more complex and tunable signaling network.

466 To further investigate the possibility that RaxX may have evolved to mimic specific host  
467 PSY peptides, we compared the sequences of RaxX13 and PSY from various species (Fig. 1B,  
468 S10). We did not observe a correlation between the sequences of RaxX from the pathogen and  
469 PSYs from a compatible host (Fig. S10). However, alignment of the 13-amino acid region did  
470 highlight variation at positions 5, 7, and 9. These residues correspond to RaxX amino acids 44,  
471 46, and 48, which are important for XA21 recognition. Notably, the variation is not random. For  
472 example, the most common amino acids in position 5 of the sequences analyzed are serine and  
473 proline in both RaxX and PSY (Fig. 1B, S10). The amino acids in this position could affect the  
474 ability of the peptides to activate specific PSY receptor(s), as they do for XA21. Alternatively,  
475 the PSY receptor(s) may simply be able to accommodate serine or proline at this position.  
476 Further research, including the characterization of the PSY receptor(s), will help address  
477 questions of specificity and lead to a greater understanding of PSY signaling.

478 The study of microbial mimicry of host molecules provides insight into both host and  
479 pathogen biology, and can lead to novel strategies for disease prevention (Gardner *et al.*, 2015).  
480 Recent studies of the JA receptor have provided new insight into selective recognition of  
481 endogenous hormones. The endogenous JA receptor is sensitive to both JA-Ile and the mimic  
482 coronatine. By making a structure-guided point mutation of a single amino acid, Zhang *et al.*  
483 generated a modified JA receptor which has strongly reduced sensitivity to coronatine while  
484 retaining endogenous JA-Ile recognition (Zhang *et al.*, 2015). Arabidopsis with the modified JA



485 receptor displayed enhanced resistance to coronatine producing *Pseudomonas* strains, and have a  
486 normal phenotype in the absence of infection (Zhang *et al.*, 2015). The Zhang *et al.* study  
487 demonstrates how understanding of bacterial mimicry of host factors can be used to engineer  
488 plants with enhanced resistance to bacterial pathogens. The findings presented in this work  
489 provide another striking example of co-evolution between the host and pathogen and provide a  
490 framework for future work directed at understanding how XA21 and the PSY receptor(s)  
491 differentially recognize RaxX and endogenous PSY peptides.

492  
493

#### 494 **Acknowledgments**

495 This work was supported by NIH GM59962 and NSF IOS-1237975. The work conducted by the  
496 Joint BioEnergy Institute was supported by the Office of Science, Office of Biological and  
497 Environmental Research, of the U.S. Department of Energy under Contract No. DE-AC02-  
498 05CH11231. We thank Birgit Kemmerling (Tübingen University) for helpful discussion and for  
499 providing the *AtPSKR1/AtPSKR2/Atlg72300* triple receptor mutant seeds used in this project.

500

#### 501 **Author contributions**

502 R.N.P., A.J., P.C.R. and W.Z. designed the research, R.N.P., A.J., W.Z. and W.F. performed  
503 experiments, J.R.D. provided resources, R.N.P, A.J. and V.S. analyzed data, R.N.P., A.J. and  
504 P.C.R. wrote the manuscript, and B.S. and W.Z. helped to revise the manuscript.

505 **References**

506

- 507 **Altschul SF, Gish W, Miller W, Myers EW, Lipman DJ. 1990.** Basic local alignment search  
508 tool. *J Mol Biol* **215**(3): 403-410.
- 509 **Amano Y, Tsubouchi H, Shinohara H, Ogawa M, Matsubayashi Y. 2007.** Tyrosine-  
510 sulfated glycopeptide involved in cellular proliferation and expansion in  
511 Arabidopsis. *Proc Natl Acad Sci U S A* **104**(46): 18333-18338.
- 512 **Bahar O, Pruitt R, Luu DD, Schwessinger B, Daudi A, Liu F, Ruan R, Fontaine-Bodin L,  
513 Koebnik R, Ronald P. 2014.** The Xanthomonas Ax21 protein is processed by the  
514 general secretory system and is secreted in association with outer membrane  
515 vesicles. *PeerJ* **2**: e242.
- 516 **Century KS, Lagman RA, Adkisson M, Morlan J, Tobias R, Schwartz K, Smith A, Love J,  
517 Ronald PC, Whalen MC. 1999.** Developmental control of Xa21-mediated disease  
518 resistance in rice. *The Plant Journal* **20**(2): 231-236.
- 519 **Chen S, Lang P, Chronis D, Zhang S, De Jong WS, Mitchum MG, Wang X. 2015.** In planta  
520 processing and glycosylation of a nematode CLAVATA3/ENDOSPERM  
521 SURROUNDING REGION-like effector and its interaction with a host CLAVATA2-like  
522 receptor to promote parasitism. *Plant Physiol* **167**(1): 262-272.
- 523 **Cosgrove DJ. 2000.** Expansive growth of plant cell walls. *Plant Physiol Biochem* **38**(1-2):  
524 109-124.
- 525 **Crooks GE, Hon G, Chandonia JM, Brenner SE. 2004.** WebLogo: a sequence logo  
526 generator. *Genome Res* **14**(6): 1188-1190.
- 527 **da Silva FG, Shen Y, Dardick C, Burdman S, Yadav RC, de Leon AL, Ronald PC. 2004.**  
528 Bacterial genes involved in type I secretion and sulfation are required to elicit the  
529 rice Xa21-mediated innate immune response. *Mol Plant Microbe Interact* **17**(6): 593-  
530 601.
- 531 **Doblas VG, Smakowska-Luzan E, Fujita S, Alassimone J, Barberon M, Madalinski M,  
532 Belkhadir Y, Geldner N. 2017.** Root diffusion barrier control by a vasculature-  
533 derived peptide binding to the SGN3 receptor. *Science* **355**(6322): 280.
- 534 **Duan L, Dietrich D, Ng CH, Chan PM, Bhalerao R, Bennett MJ, Dinneny JR. 2013.**  
535 Endodermal ABA signaling promotes lateral root quiescence during salt stress in  
536 Arabidopsis seedlings. *Plant Cell* **25**(1): 324-341.
- 537 **Eves-Van Den Akker S, Lilley CJ, Yusup HB, Jones JT, Urwin PE. 2016.** Functional C-  
538 TERMINALLY ENCODED PEPTIDE (CEP) plant hormone domains evolved de novo in  
539 the plant parasite *Rotylenchulus reniformis*. *Mol Plant Pathol* **17**(8): 1265-1275.
- 540 **Farzan M, Mirzabekov T, Kolchinsky P, Wyatt R, Cayabyab M, Gerard NP, Gerard C,  
541 Sodroski J, Choe H. 1999.** Tyrosine sulfation of the amino terminus of CCR5  
542 facilitates HIV-1 entry. *Cell* **96**(5): 667-676.
- 543 **Fatima U, Senthil-Kumar M. 2015.** Plant and pathogen nutrient acquisition strategies.  
544 *Front Plant Sci* **6**: 750.
- 545 **Fuglsang AT, Kristensen A, Cuin TA, Schulze WX, Persson J, Thuesen KH, Ytting CK,  
546 Oehlenschlaeger CB, Mahmood K, Sondergaard TE, et al. 2014.** Receptor kinase-  
547 mediated control of primary active proton pumping at the plasma membrane. *Plant*  
548 *J* **80**(6): 951-964.

- 549 **Gardner MR, Kattenhorn LM, Kondur HR, von Schaewen M, Dorfman T, Chiang JJ,**  
550 **Haworth KG, Decker JM, Alpert MD, Bailey CC, et al. 2015.** AAV-expressed eCD4-  
551 Ig provides durable protection from multiple SHIV challenges. *Nature* **519**(7541):  
552 87-91.
- 553 **Geng Y, Wu R, Wee CW, Xie F, Wei X, Chan PM, Tham C, Duan L, Dinneny JR. 2013.** A  
554 spatio-temporal understanding of growth regulation during the salt stress response  
555 in Arabidopsis. *Plant Cell* **25**(6): 2132-2154.
- 556 **Hager A. 2003.** Role of the plasma membrane H<sup>+</sup>-ATPase in auxin-induced elongation  
557 growth: historical and new aspects. *J Plant Res* **116**(6): 483-505.
- 558 **Igarashi D, Tsuda K, Katagiri F. 2012.** The peptide growth factor, phyto-sulfokine,  
559 attenuates pattern-triggered immunity. *Plant J* **71**(2): 194-204.
- 560 **Kauffman H, Reddy A, Hsieh S, Merca S. 1973.** Improved technique for evaluating  
561 resistance of rice varieties to *Xanthomonas-oryzae*. *Plant Disease Reporter* **57**: 537-  
562 541.
- 563 **Kay S, Hahn S, Marois E, Hause G, Bonas U. 2007.** A bacterial effector acts as a plant  
564 transcription factor and induces a cell size regulator. *Science* **318**(5850): 648-651.
- 565 **Kearse M, Moir R, Wilson A, Stones-Havas S, Cheung M, Sturrock S, Buxton S, Cooper A,**  
566 **Markowitz S, Duran C, et al. 2012.** Geneious Basic: an integrated and extendable  
567 desktop software platform for the organization and analysis of sequence data.  
568 *Bioinformatics* **28**(12): 1647-1649.
- 569 **Knodler LA, Celli J, Finlay BB. 2001.** Pathogenic trickery: deception of host cell processes.  
570 *Nat Rev Mol Cell Biol* **2**(8): 578-588.
- 571 **Komori R, Amano Y, Ogawa-Ohnishi M, Matsubayashi Y. 2009.** Identification of  
572 tyrosylprotein sulfotransferase in Arabidopsis. *Proc Natl Acad Sci U S A* **106**(35):  
573 15067-15072.
- 574 **Loper JE, Lindow SE. 1994.** A biological sensor for iron available to bacteria in their  
575 habitats on plant surfaces. *Appl Environ Microbiol* **60**(6): 1934-1941.
- 576 **Mahmood K, Kannangara R, Jorgensen K, Fuglsang AT. 2014.** Analysis of peptide PSY1  
577 responding transcripts in the two Arabidopsis plant lines: wild type and psy1r  
578 receptor mutant. *BMC Genomics* **15**: 441.
- 579 **Marois E, Van den Ackerveken G, Bonas U. 2002.** The xanthomonas type III effector  
580 protein AvrBs3 modulates plant gene expression and induces cell hypertrophy in  
581 the susceptible host. *Mol Plant Microbe Interact* **15**(7): 637-646.
- 582 **Masachis S, Segorbe D, Turrà D, Leon-Ruiz M, Fürst U, El Ghalid M, Leonard G, López-**  
583 **Berges MS, Richards TA, Felix G, et al. 2016.** A fungal pathogen secretes plant  
584 alkalizing peptides to increase infection. *Nature Microbiology* **1**.
- 585 **Matsubayashi Y. 2014.** Posttranslationally modified small-peptide signals in plants. *Annu*  
586 *Rev Plant Biol* **65**: 385-413.
- 587 **Matsubayashi Y, Sakagami Y. 1996.** Phyto-sulfokine, sulfated peptides that induce the  
588 proliferation of single mesophyll cells of *Asparagus officinalis* L. *Proc Natl Acad Sci U*  
589 *SA* **93**(15): 7623-7627.
- 590 **Matsuzaki Y, Ogawa-Ohnishi M, Mori A, Matsubayashi Y. 2010.** Secreted peptide signals  
591 required for maintenance of root stem cell niche in Arabidopsis. *Science* **329**(5995):  
592 1065-1067.
- 593 **Melotto M, Underwood W, Koczan J, Nomura K, He SY. 2006.** Plant stomata function in  
594 innate immunity against bacterial invasion. *Cell* **126**(5): 969-980.

- 595 **Mitchum MG, Wang X, Davis EL. 2008.** Diverse and conserved roles of CLE peptides. *Curr*  
596 *Opin Plant Biol* **11**(1): 75-81.
- 597 **Mitchum MG, Wang X, Wang J, Davis EL. 2012.** Role of nematode peptides and other  
598 small molecules in plant parasitism. *Annu Rev Phytopathol* **50**: 175-195.
- 599 **Moore KL. 2009.** Protein tyrosine sulfation: a critical posttranslation modification in  
600 plants and animals. *Proc Natl Acad Sci U S A* **106**(35): 14741-14742.
- 601 **Mosher S, Kemmerling B. 2013.** PSKR1 and PSY1R-mediated regulation of plant defense  
602 responses. *Plant Signal Behav* **8**(5): e24119.
- 603 **Mosher S, Seybold H, Rodriguez P, Stahl M, Davies KA, Dayaratne S, Morillo SA,**  
604 **Wierzba M, Favery B, Keller H, et al. 2013.** The tyrosine-sulfated peptide  
605 receptors PSKR1 and PSY1R modify the immunity of Arabidopsis to biotrophic and  
606 necrotrophic pathogens in an antagonistic manner. *Plant J* **73**(3): 469-482.
- 607 **Murphy E, De Smet I. 2014.** Understanding the RALF family: a tale of many species. *Trends*  
608 *Plant Sci* **19**(10): 664-671.
- 609 **Nakayama T, Shinohara H, Tanaka M, Baba K, Ogawa-Ohnishi M, Matsubayashi Y.**  
610 **2017.** A peptide hormone required for Casparian strip diffusion barrier formation  
611 in *Arabidopsis* roots. *Science* **355**(6322): 284.
- 612 **Nesic D, Miller MC, Quinkert ZT, Stein M, Chait BT, Stebbins CE. 2010.** Helicobacter  
613 pylori CagA inhibits PAR1-MARK family kinases by mimicking host substrates. *Nat*  
614 *Struct Mol Biol* **17**(1): 130-132.
- 615 **Nino-Liu DO, Ronald PC, Bogdanove AJ. 2006.** Xanthomonas oryzae pathovars: model  
616 pathogens of a model crop. *Mol Plant Pathol* **7**(5): 303-324.
- 617 **Okamoto S, Suzuki T, Kawaguchi M, Higashiyama T, Matsubayashi Y. 2015.** A  
618 comprehensive strategy for identifying long-distance mobile peptides in xylem sap.  
619 *Plant J* **84**(3): 611-620.
- 620 **Petersen TN, Brunak S, von Heijne G, Nielsen H. 2011.** SignalP 4.0: discriminating signal  
621 peptides from transmembrane regions. *Nat Methods* **8**(10): 785-786.
- 622 **Pruitt RN, Schwessinger B, Joe A, Thomas N, Liu F, Albert M, Robinson MR, Chan LJG,**  
623 **D. LD, Chen H, et al. 2015.** The rice immune receptor XA21 recognizes a tyrosine-  
624 sulfated peptide from a Gram-negative bacterium *Science Advances*.
- 625 **Rodriguez E, El Ghoul H, Mundy J, Petersen M. 2015.** Making sense of plant  
626 autoimmunity and 'negative regulators'. *FEBS J*.
- 627 **Schneider TD, Stephens RM. 1990.** Sequence logos: a new way to display consensus  
628 sequences. *Nucleic Acids Res* **18**(20): 6097-6100.
- 629 **Shinohara H, Mori A, Yasue N, Sumida K, Matsubayashi Y. 2016.** Identification of three  
630 LRR-RKs involved in perception of root meristem growth factor in Arabidopsis. *Proc*  
631 *Natl Acad Sci U S A*.
- 632 **Song WY, Wang GL, Chen LL, Kim HS, Pi LY, Holsten T, Gardner J, Wang B, Zhai WX,**  
633 **Zhu LH, et al. 1995.** A receptor kinase-like protein encoded by the rice disease  
634 resistance gene, Xa21. *Science* **270**(5243): 1804-1806.
- 635 **Spoel SH, Dong X. 2012.** How do plants achieve immunity? Defence without specialized  
636 immune cells. *Nat Rev Immunol* **12**(2): 89-100.
- 637 **Starkey M, Rahme LG. 2009.** Modeling Pseudomonas aeruginosa pathogenesis in plant  
638 hosts. *Nat Protoc* **4**(2): 117-124.

- 639 **Stone MJ, Chuang S, Hou X, Shoham M, Zhu JZ. 2009.** Tyrosine sulfation: an increasingly  
640 recognised post-translational modification of secreted proteins. *N Biotechnol* **25**(5):  
641 299-317.
- 642 **Wang X, Mitchum MG, Gao B, Li C, Diab H, Baum TJ, Hussey RS, Davis EL. 2005.** A  
643 parasitism gene from a plant-parasitic nematode with function similar to  
644 CLAVATA3/ESR (CLE) of *Arabidopsis thaliana*. *Mol Plant Pathol* **6**(2): 187-191.
- 645 **Weiler EW, Kutchan TM, Gorba T, Brodschelm W, Niesel U, Bublitz F. 1994.** The  
646 *Pseudomonas* phytotoxin coronatine mimics octadecanoid signalling molecules of  
647 higher plants. *FEBS Lett* **345**(1): 9-13.
- 648 **Yamaguchi YL, Ishida T, Sawa S. 2016.** CLE peptides and their signaling pathways in  
649 plant development. *J Exp Bot*.
- 650 **Zhang L, Yao J, Withers J, Xin XF, Banerjee R, Fariduddin Q, Nakamura Y, Nomura K,**  
651 **Howe GA, Boland W, et al. 2015.** Host target modification as a strategy to counter  
652 pathogen hijacking of the jasmonate hormone receptor. *Proc Natl Acad Sci U S A*  
653 **112**(46): 14354-14359.  
654

**Figure 1. Sequence similarity of RaxX and plant PSYs.** a) The mature 18 amino acid AtPSY1 (amino acids 48-65 of the AtPSY1 precursor protein) and a synthetic PSY-like repeat from OsPSY1 (amino acids 64-81 of the AtPSY1 precursor protein) were aligned with the sequences of three synthetic RaxX peptides from *Xoo* strain PXO99. The numbers adjacent to the sequence indicate the amino acid positions of the terminal peptide residues within the predicted precursor protein. Endogenous AtPSY1 has 3 postranslationally modified residues, which are shown at the top of alignment: a sulfotyrosine and two hydroxyprolines. The first hydroxyproline is further modified by chain of three L-arabinose residues (L-Ara<sub>3</sub>). Residues in the black box are identical in all three sequences. The grey boxes indicate a conserved residue in two sequences among AtPSY1, OsPSY1a and RaxX. The sulfated tyrosine is marked in yellow box. b) Sequence logos depicting the amino acid composition in the conserved 13-amino acid region of RaxX and PSY proteins. The logos were generated from 34 PSY orthologs (Fig. S1) and 17 non-redundant RaxX13 sequences (Table S1).

**Figure 2. Sulfated RaxX21 promotes root growth in *Arabidopsis* and rice.** Root lengths of *Arabidopsis* a) Col-0 or c) *tpst-1* seedlings grown on 0.5× MS vertical plates with or without 100 nM of the indicated peptides. Bars indicate the average seedling root length measured after 8 days (n ≥ 18). b and d) 8-day old Col-0 and *tpst-1* seedlings grown as in 2a and c, respectively. e) Growth rate of six day old *tpst-1* seedlings following transfer to 0.5× MS plates containing 250 nM RaxX21-sY, 250 nM AtPSY1, or lacking peptide (Mock) (n ≥ 7). Growth was monitored by continual imaging over 20 h. f) Root lengths of 6-day old rice seedlings (Tapei 309) grown on 0.5× MS with or without 100 nM of the indicated peptides (n ≥ 37). Error bars indicate standard error. Statistical analysis was performed using the Tukey-Kramer honestly significant difference test for mean comparison using the JMP software. Different letters represent significant differences within each plant genotype (p ≤ 0.05).

**Figure 3. RaxX, AtPSY1, and PSK do not have additive effects on root growth in *Arabidopsis*.** *tpst-1* seedlings were grown on 0.5× MS vertical plates with or without 100 nM of each of the indicated peptides. Bars indicate the average seedling root length measured 8 days after plating seeds (n ≥ 18). Error bars indicate standard error. Statistical analysis was performed

using the Tukey-Kramer honestly significant difference test for mean comparison using the JMP software. Different letters represent significant differences within each plant genotype ( $p \leq 0.05$ ). Experiments were performed at least two times with similar results.

**Figure 4. The Arabidopsis gene *At1g72300* is not required for RaxX- and PSY-induced root growth.** Arabidopsis Col-0, *At1g72300* or *AtPSKR1/AtPSKR2/At1g72300* triple receptor mutant seeds were grown on 0.5× MS plates with or without 100 nM of the indicated peptides. Root lengths were measured 8 days after placing seeds on plates. Error bars indicate standard error ( $n \geq 22$ ). Statistical analysis was performed using the Tukey-Kramer honestly significant difference test for mean comparison using the JMP software. Different letters represent significant differences within each plant genotype ( $p \leq 0.05$ ). The experiment was performed at least three times with similar results.

**Figure 5. Differential activities of PSY and RaxX peptides in growth promotion and activation of XA21-mediated immunity.** ROS production in leaves of a) XA21 rice (XA21-Kitaake) and b) wild type rice (Kitaake) treated with H<sub>2</sub>O (Mock) or 500 nM of the indicated peptide. Bars represent average ROS production over 90 min following addition of peptide ( $n = 6$ ). RLU stands for relative light units. c) TP309 seeds were grown on 0.5× MS media for with or without 100 nM of the indicated peptides. Root lengths were measured 5 days after placing seeds on plates ( $n \geq 25$ ). d) Arabidopsis *tpst-1* seeds were grown on 0.5× MS vertical plates with or without 100 nM of the indicated peptides. Root lengths were measured 8 days after placing seeds on plates ( $n \geq 16$ ). Error bars indicate standard error. Statistical analysis was performed using the Tukey-Kramer honestly significant difference test for mean comparison using the JMP software. Different letters represent significant differences within each plant genotype ( $p \leq 0.05$ ). Experiments were performed at least two times with similar results.

**Figure 6. RaxX peptides derived from RaxX encoded by *Xoc*, *Xe*, and *Xcm* promote root growth in Arabidopsis seedlings.** *tpst-1* seedlings were grown on 0.5× MS vertical plates with or without 100 nM of the indicated peptides. Bars indicate the average seedling root length measured after 8 days ( $n \geq 18$ ). Error bars indicate standard error. Statistical analysis was performed using the Tukey-Kramer honestly significant difference test for mean comparison

using the JMP software. Different letters represent significant differences within each plant genotype ( $p \leq 0.05$ ). Experiments were performed at least two times with similar results.

**Figure 7. The *Xoo raxX* mutant is impaired in virulence on rice.** TP309 (A) and XA21-TP309 (B) were inoculated by clipping with scissors dipped in the indicated *Xoo* suspensions at a density of  $10^6$  colony forming units (CFU) per mL. Bars indicate the mean lesion length  $\pm$  standard error (SE) measured 14 days after inoculation ( $n \geq 24$ ). The ‘\*’ indicates statistically significant difference from PXO99 within each plant genotype using Dunnett’s test ( $\alpha=0.01$ ). Experiments were performed at least five times with similar results.

**Figure 8. Proposed model of RaxX production and activation of PSY and XA21 signaling.** PSY is produced and detected by plant cells to regulate growth. RaxX is produced in *Xoo*, sulfated by RaxST, and secreted by a type I secretion system composed of RaxA, RaxB, and RaxC. Secreted sulfated RaxX induces signaling through the endogenous PSY receptor(s). The wild rice *O. longistaminata* subsequently evolved the immune receptor XA21 which is activated by RaxX, but not endogenous PSY peptides.



## **Supplemental Information**

**Table S1. RaxX13 sequences from diverse Xanthomonas sources.**

**Table S2. Synthetic peptides used in this study.**

**Figure S1. Putative PSY-like proteins from Arabidopsis (At), rice (Os), banana (Ma), tomato (Sl), and wheat (Ta).**

**Figure S2. Comparison of the RaxX sequences from diverse bacterial strains.**

**Figure S3. Dose dependent activity of RaxX21-Y, RaxX21-sY, AtPSY1, and PSK on root growth of Arabidopsis *tpst-1* seedlings.**

**Figure S4. Sulfated RaxX21 promotes root growth in Kitaake rice.**

**Figure S5. Sulfated RaxX21 promotes root growth in XA21 rice.**

**Figure S6. Validation of the *At1g72300* mutants.**

**Figure S7. Addition of PSK partially blocks elf18-triggered growth inhibition in Arabidopsis seedlings, whereas RaxX21-sY and AtPSY1 do not.**

**Figure S8. PXO99 strain lacking RaxX is impaired in virulence.**

**Figure S9. Sequence similarity of RaxX from *Xoo* and *Xoc* with selected rice PSYs.**

**Figure S10. Comparison of RaxX and PSY peptides from various species.**

(a)

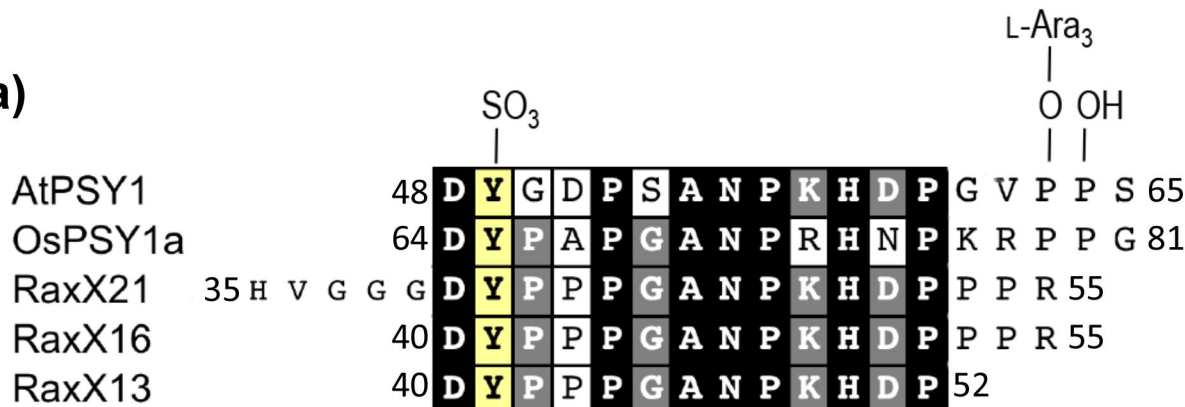

(b)

PSY

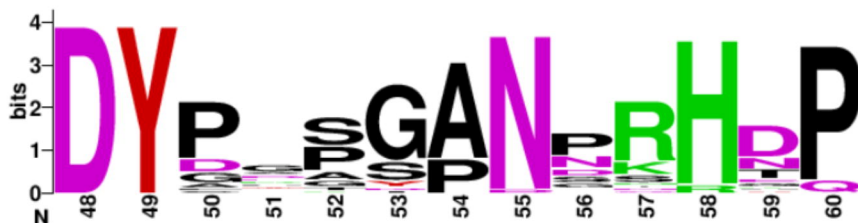

RaxX

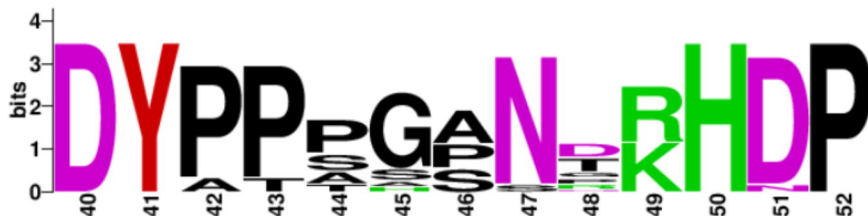

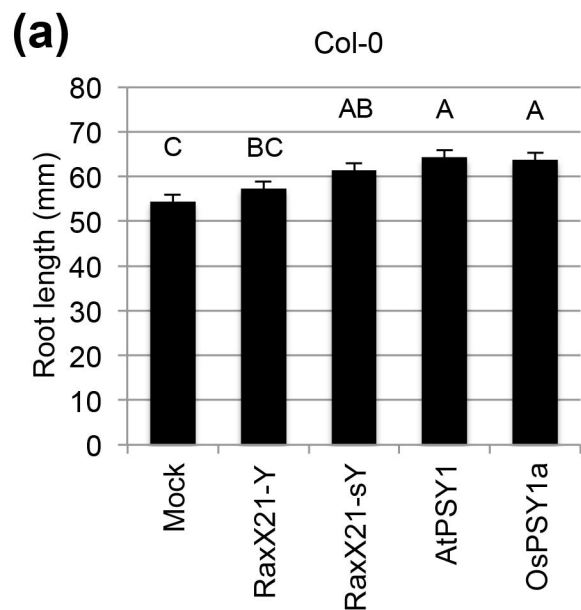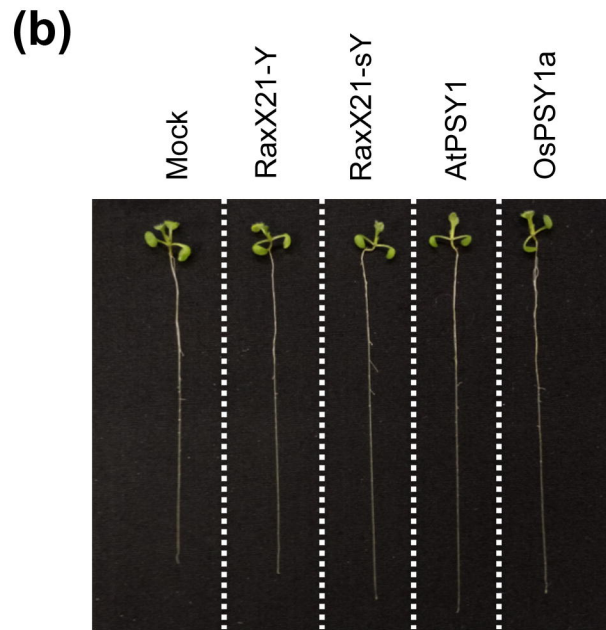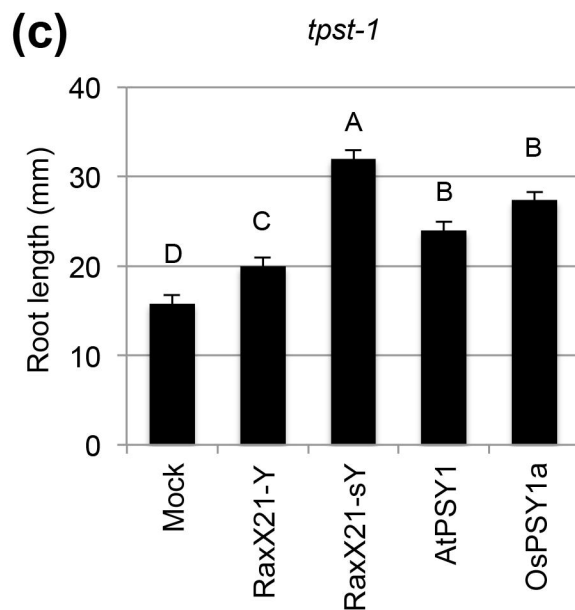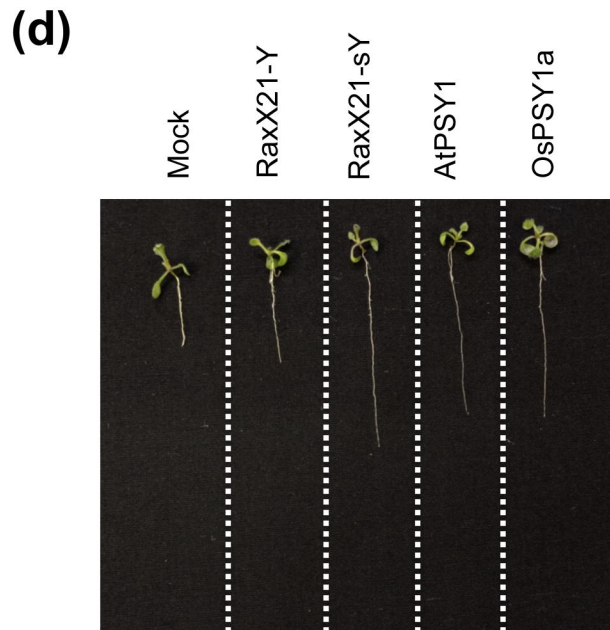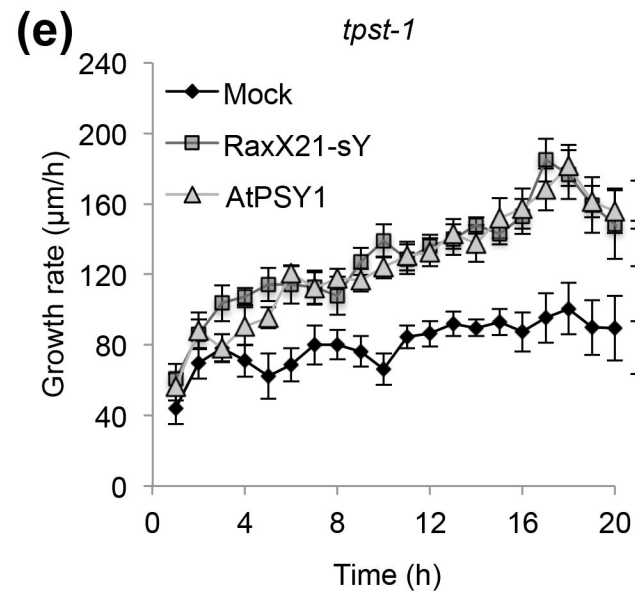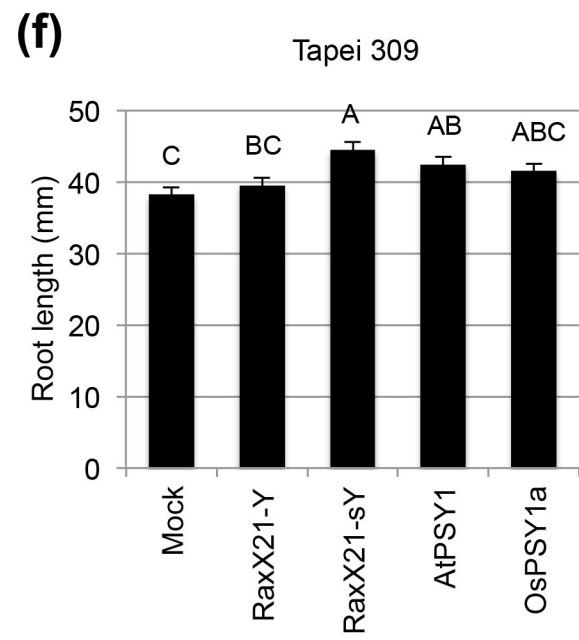

*tpst-1*

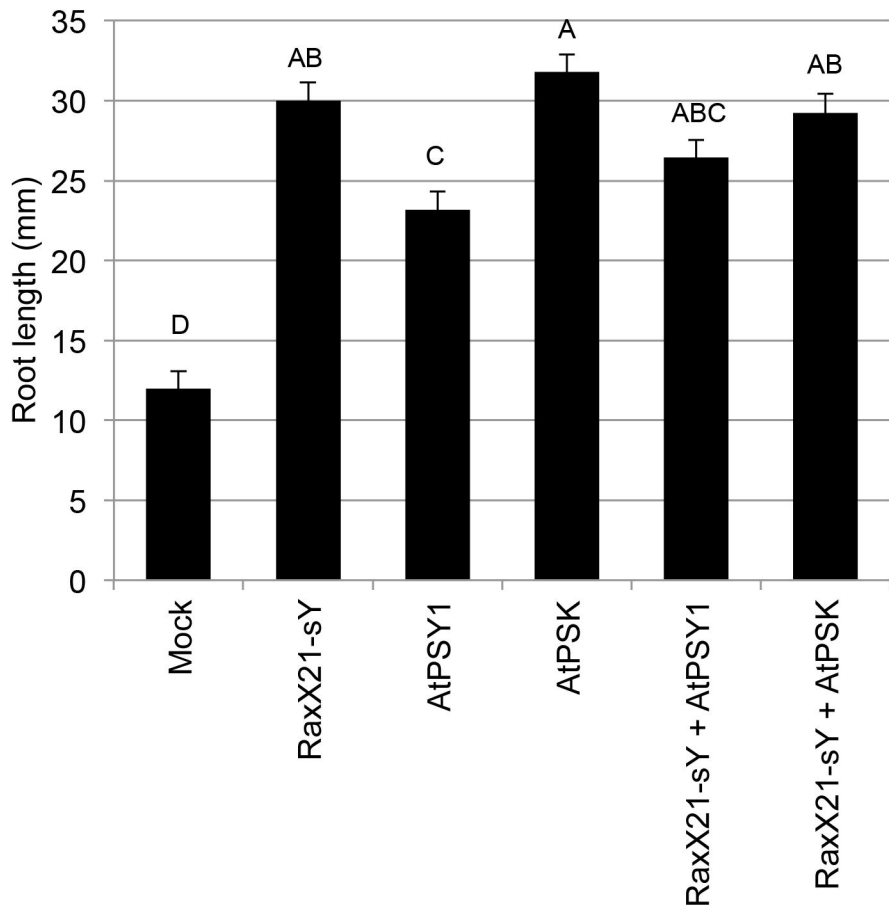

Col-0

*At1g72300**pskr1/pskr2/At1g72300*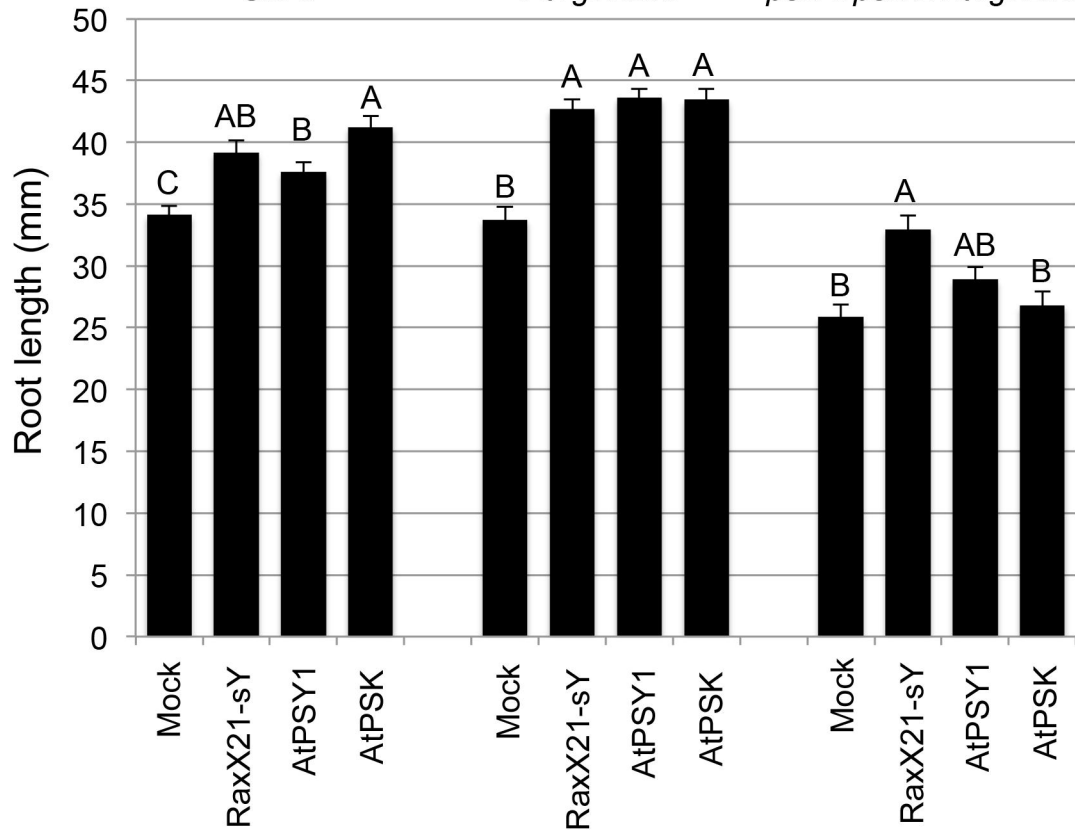

**(a)** XA21-Kitaake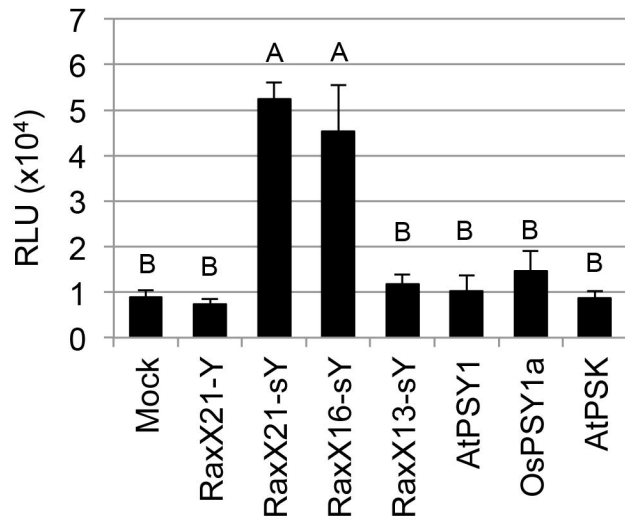**(b)** Kitaake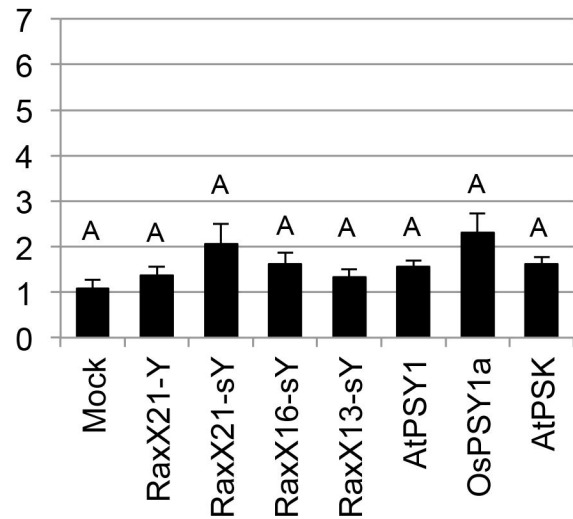**(c)** TP309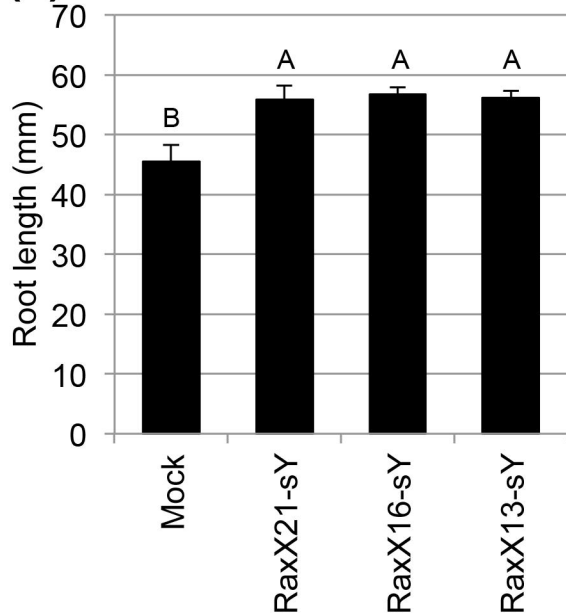**(d)** *tpst-1*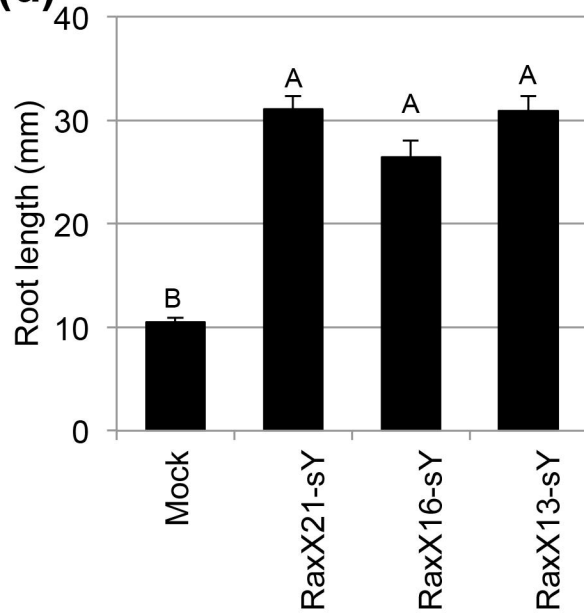

*tpst-1*

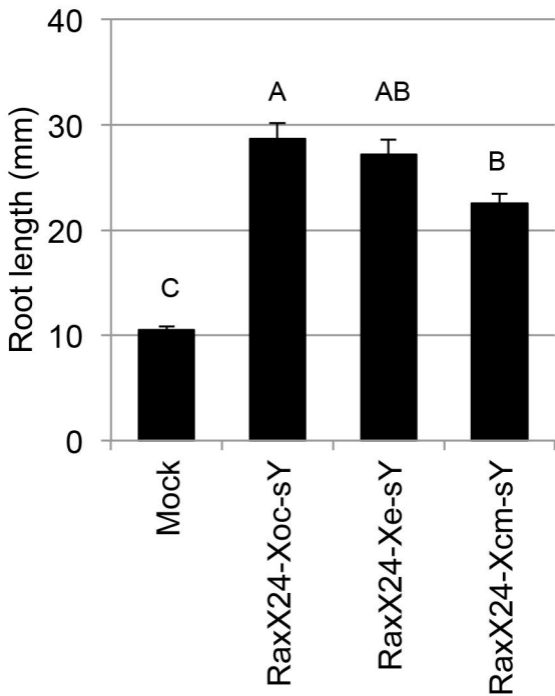

**(a)**

TP309

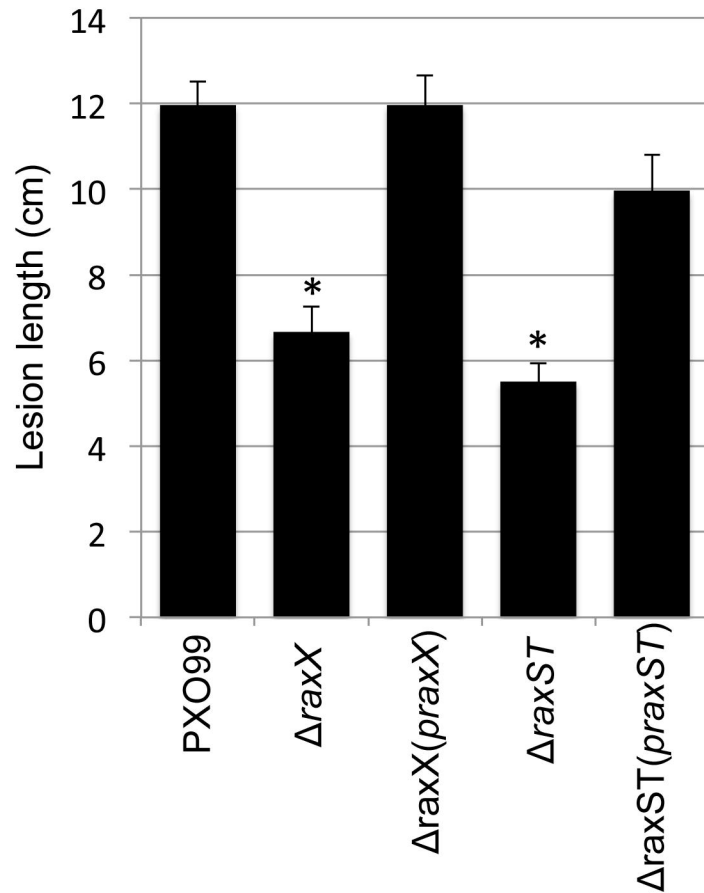**(b)**

XA21-TP309

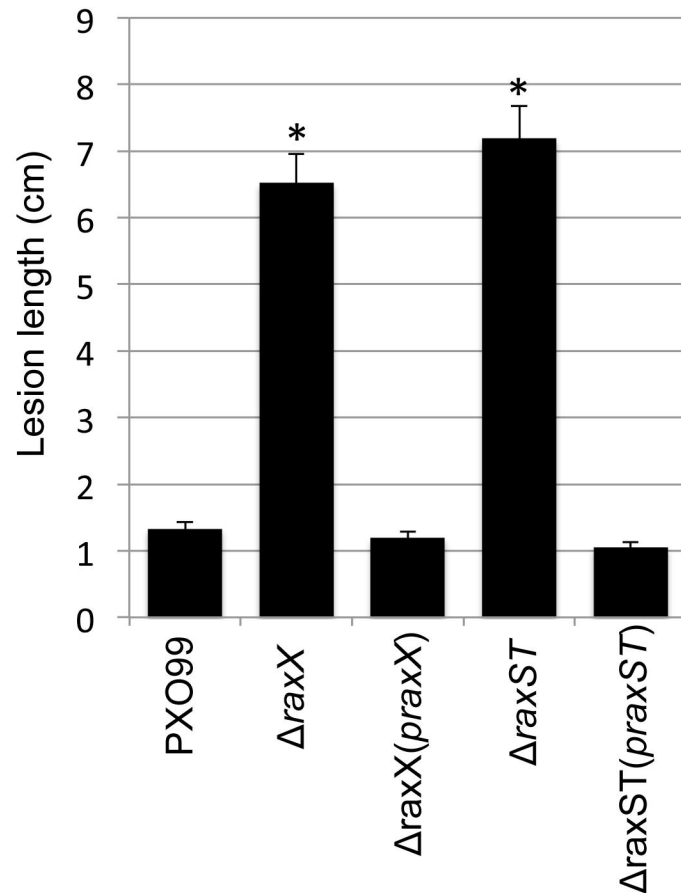



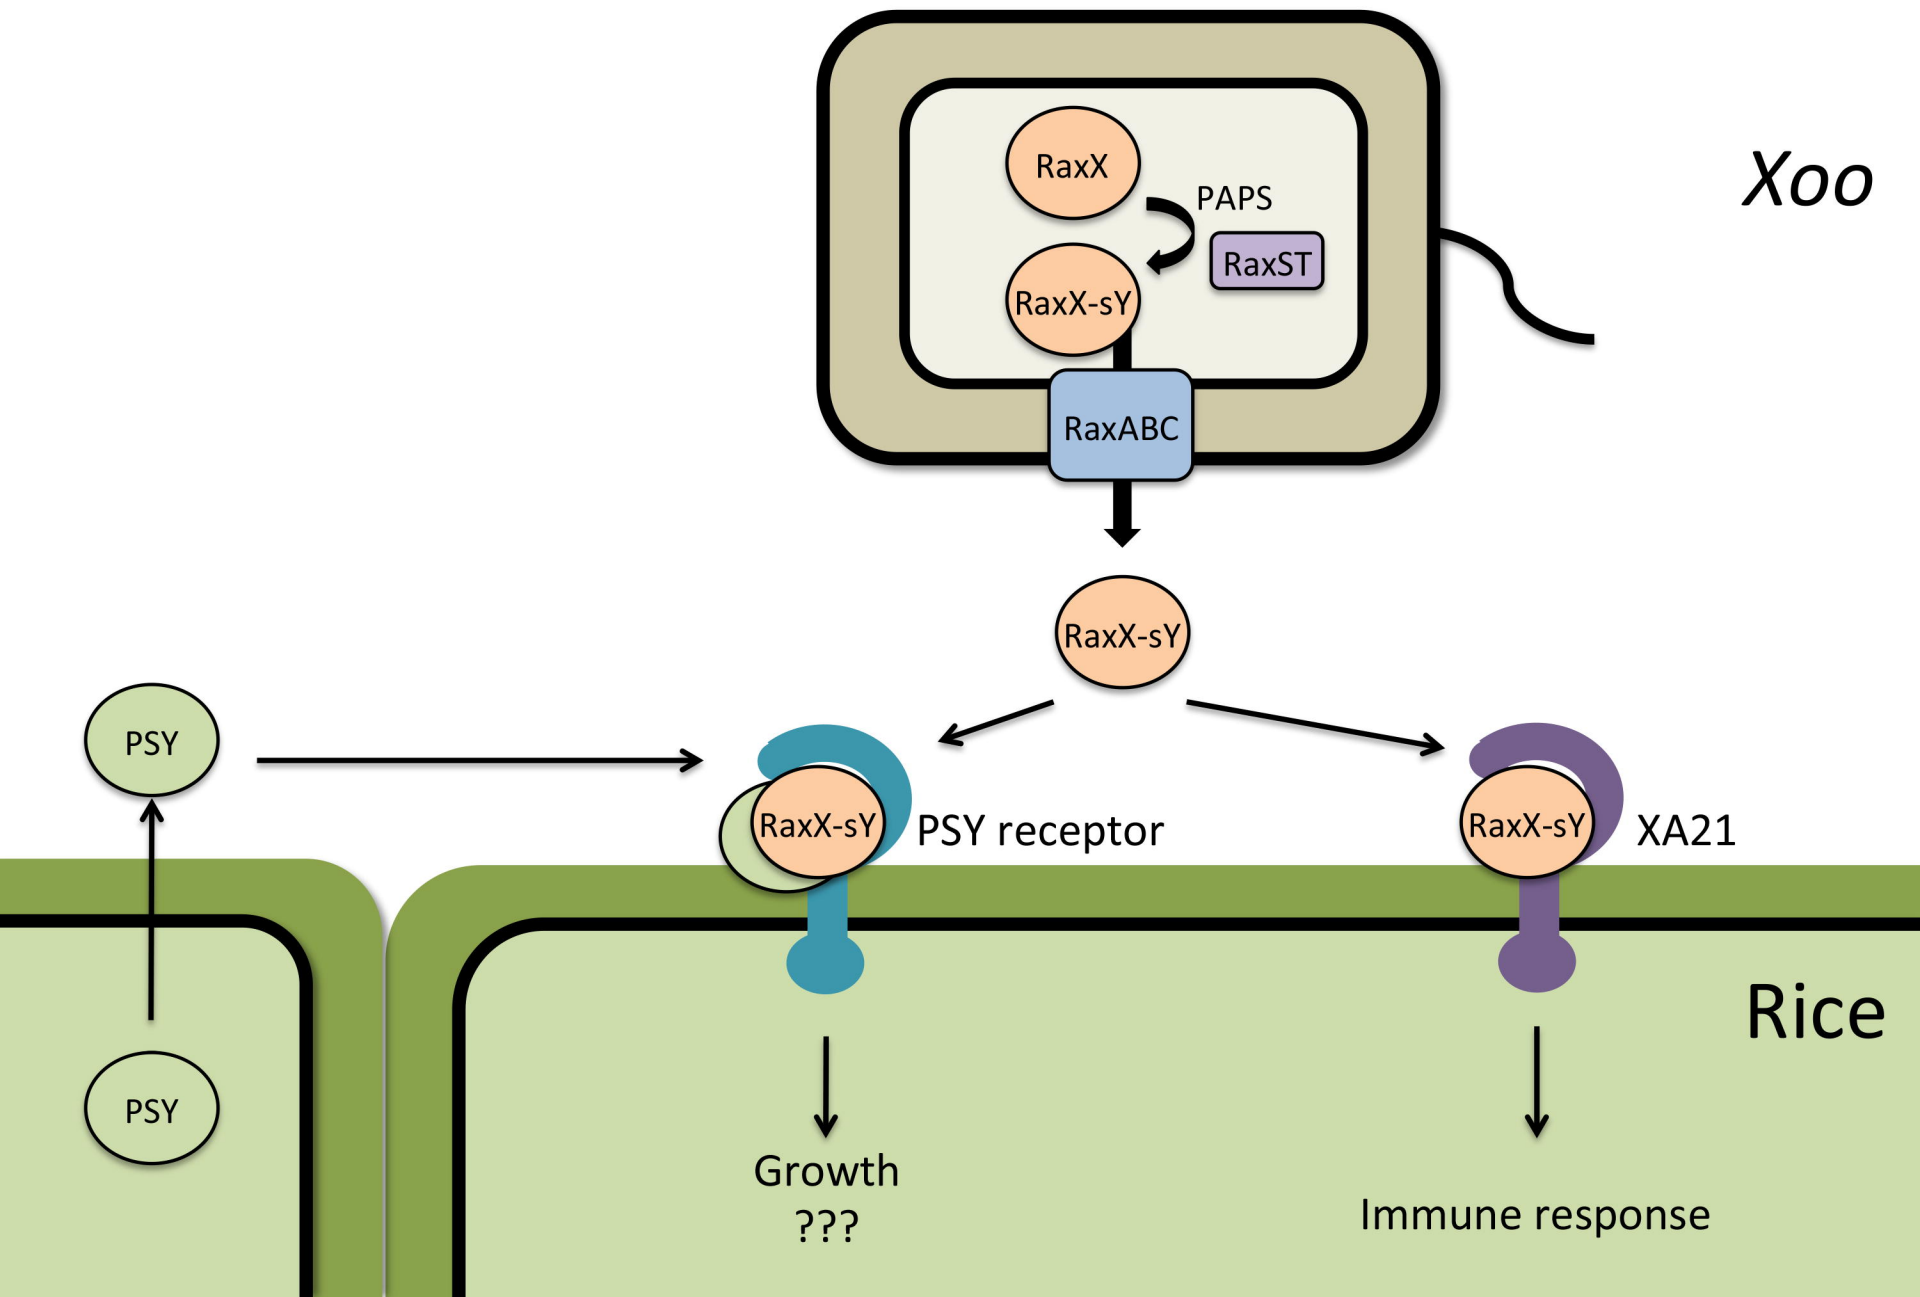

Source: https://www.biorxiv.org/content/biorxiv/early/2017/03/14/116897.full.pdf
